# Supplementary material
Source: PubMed Central journal article supplement (PMC6119604)
Supplement: NIHMS78573-supplement-Supplemental_Content.pdf [file NIHMS78573-supplement-Supplemental_Content.pdf]

**Supplementary Figure A:** Flow chart describing the derivation of participants included in the primary analyses. \*referral criteria were any one of: best-corrected visual acuity >0.34 LogMAR in either eye, IOP >24mmHg in either eye, IOP >21mmHg in either eye with  $\geq 3$  borderline HRT II sectors on Moorfields Regression Analysis, GDx RNFL average thickness/standard deviation/superior thickness/inferior thickness measures outside normal limits in either eye (1 reading at  $P < 0.5\%$  or 2 readings  $P < 1\%$  or 3 readings  $P < 5\%$ ), any HRT II sector Moorfields Regression Analysis outside normal limits, manifest abnormalities on fundus photography in either eye.

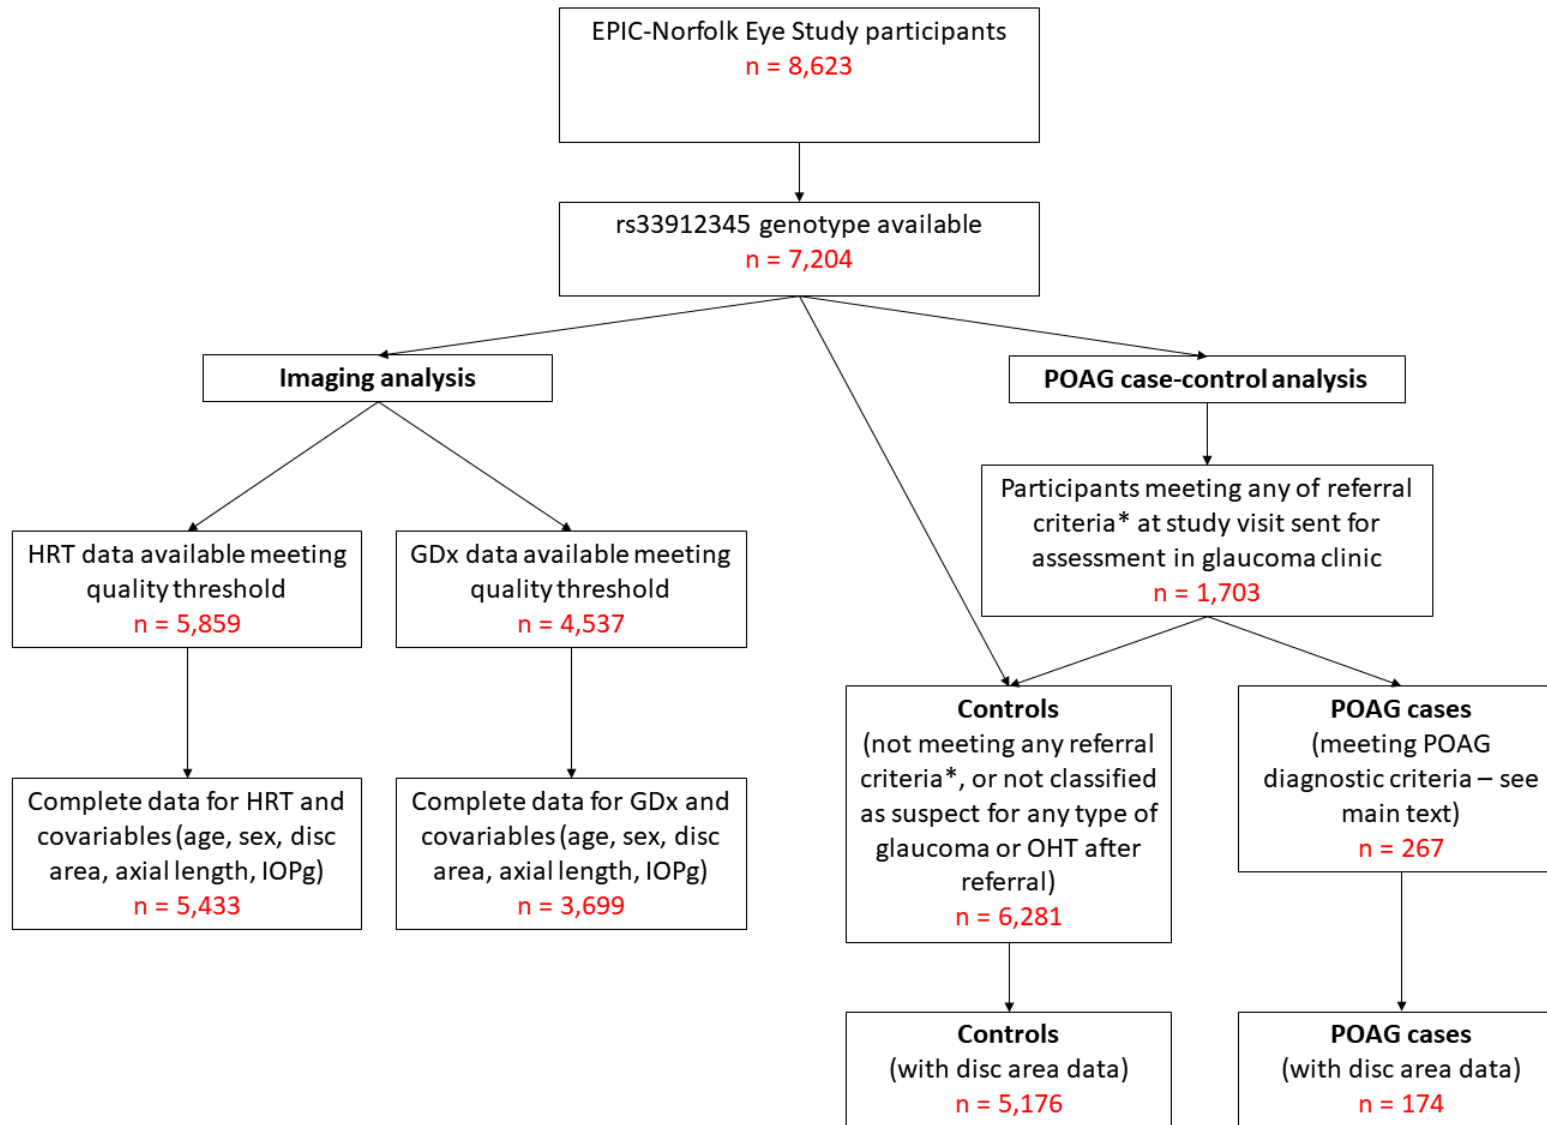

**Supplementary Table A: Sensitivity analyses for association between rs33912345 genotype and optic nerve head parameters.** Results are from multivariable linear regression models with the optic nerve head parameter as the dependent variable and genotype dosage as an explanatory variable. The first model is for all included participants without excluding glaucoma (n = 5,433 for HRT, n = 3,699 for GDx) and adjustment for IOPcc rather than IOPg. The second model is for all participants following exclusion of participants with glaucoma or history of glaucoma medication or procedure (following exclusion: n = 5,196 for HRT, n = 3,572 for GDx). *P*-values < 0.01 are in bold.

|                                      | <b>Sensitivity analysis 1: All participants with alternative IOP adjustment (adjusted for age, sex, disc area, axial length and IOPcc)</b> |                  |                       | <b>Sensitivity analysis 2: Glaucoma excluded (adjusted for age, sex, disc area, axial length and IOPg)</b> |                  |                       |
|--------------------------------------|--------------------------------------------------------------------------------------------------------------------------------------------|------------------|-----------------------|------------------------------------------------------------------------------------------------------------|------------------|-----------------------|
|                                      | <b>Difference per risk allele (C)</b>                                                                                                      | <b>95% CI</b>    | <b><i>P</i>-value</b> | <b>Difference per risk allele (C)</b>                                                                      | <b>95% CI</b>    | <b><i>P</i>-value</b> |
| <b>HRT rim area (mm<sup>2</sup>)</b> | -0.030                                                                                                                                     | (-0.040, -0.020) | <b>5.66E-09</b>       | -0.025                                                                                                     | (-0.034, -0.015) | <b>3.35E-07</b>       |
| <b>HRT VCDR</b>                      | 0.025                                                                                                                                      | (0.017, 0.033)   | <b>3.62E-10</b>       | 0.022                                                                                                      | (0.014, 0.029)   | <b>4.81E-08</b>       |
| <b>GDx RNFL thickness (μm)</b>       | -0.389                                                                                                                                     | (-0.627, -0.151) | <b>0.001</b>          | -0.319                                                                                                     | (-0.549, -0.089) | <b>0.007</b>          |

**Supplementary Table B: Association between rs33912345 genotype with sectoral optic nerve head (HRT) and RNFL thickness (GDxVCC) parameters.** Results are from multivariable linear regression models with the sectoral optic nerve head parameter as the dependent variable and genotype dosage as an explanatory variable, adjusted for age, sex, disc area, axial length and IOPg. *P*-values < 0.01 are in bold.

|                                            | <b>Difference<br/>per risk<br/>allele</b> | <b>95% CI</b>    | <b><i>P</i>-value</b> |
|--------------------------------------------|-------------------------------------------|------------------|-----------------------|
| <b>HRT rim area</b>                        |                                           |                  |                       |
| Superotemporal rim area (mm <sup>2</sup> ) | -0.006                                    | (-0.007, -0.004) | <b>&lt;0.001</b>      |
| Temporal rim area (mm <sup>2</sup> )       | -0.007                                    | (-0.011, -0.004) | <b>&lt;0.001</b>      |
| Inferotemporal rim area (mm <sup>2</sup> ) | -0.004                                    | (-0.006, -0.002) | <b>&lt;0.001</b>      |
| Superonasal rim area (mm <sup>2</sup> )    | -0.005                                    | (-0.006, -0.003) | <b>&lt;0.001</b>      |
| Inferonasal rim area (mm <sup>2</sup> )    | -0.004                                    | (-0.005, -0.002) | <b>&lt;0.001</b>      |
| Nasal rim area (mm <sup>2</sup> )          | -0.005                                    | (-0.007, -0.002) | <b>&lt;0.001</b>      |
| <b>GDx RNFL thickness</b>                  |                                           |                  |                       |
| Superior thickness (μm)                    | -0.683                                    | (-1.023, -0.344) | <b>&lt;0.001</b>      |
| Inferior thickness (μm)                    | -0.641                                    | (-0.998, -0.284) | <b>&lt;0.001</b>      |
| Temporal thickness (μm)                    | -0.327                                    | (-0.617, -0.038) | 0.027                 |
| Nasal thickness (μm)                       | 0.409                                     | (0.051, 0.768)   | 0.025                 |

**Supplementary Table C: Association between rs33912345 genotype and optic nerve head parameters in participants with primary open-angle glaucoma (POAG).** Results are shown for the associations among POAG patients with complete data available for genotype, optic nerve parameter and covariables (numbers included in each analysis are shown). We present results for two models: the first model is adjusted for age, sex and disc area; the second model is adjusted for age, sex, disc area, axial length and IOPg.

|                                 | Adjusted for age, sex and disc area |                            |                  |              | Adjusted for age, sex, disc area, axial length and IOPg |                            |                  |              |
|---------------------------------|-------------------------------------|----------------------------|------------------|--------------|---------------------------------------------------------|----------------------------|------------------|--------------|
|                                 | Number of participants              | Change per risk allele (C) | 95% CI           | P-value      | Number of participants                                  | Change per risk allele (C) | 95% CI           | P-value      |
| HRT rim area (mm <sup>2</sup> ) | 174                                 | -0.073                     | (-0.128, -0.018) | <b>0.009</b> | 164                                                     | -0.067                     | (-0.123, -0.010) | <b>0.020</b> |
| HRT VCDR                        | 174                                 | 0.044                      | ( 0.011, 0.077)  | <b>0.010</b> | 164                                                     | 0.042                      | ( 0.008, 0.076)  | <b>0.015</b> |
| GDx RNFL thickness (μm)         | 86                                  | -1.608                     | (-3.230, 0.014)  | <b>0.052</b> | 81                                                      | -1.242                     | (-2.847, 0.362)  | <b>0.13</b>  |
